# Supplementary material
Source: HighWire-hosted journal article supplement (https://learnmem.cshlp.org/content/suppl/2020/01/02/27.2.33)
Supplement: Supplemental_Figure_Legends_.docx [file Supplemental_Figure_Legends_.docx]

***Supplementary Figure 1:*** *Recombinant adeno-associated viruses (rAAVs) transfected also non-pyramidal cells.* ***A)*** *In addition to pyramidal cells, non-pyramidal cells were labeled in close proximity to the viral injections in CA1. The dotted line represents the pyramidal layer. Non-pyramidal cells were labeled above the pyramidal layer, in stratum oriens, and below in stratum radiatum and stratum lacunosum-moleculare. Scale bar 50 µm.*

***Supplementary Figure 2:*** *The growth hormone (GH) manipulations did not affect the weight of the animals, nor swim speed or path length in the water maze.* ***A)*** *Weights of all animals before surgery (black) and at the day of sacrifice (grey). Each dot represents an individual value. The mean value is indicated in light grey lines. Dark grey lines indicate SEM.* ***B)*** *Swim speed in the water maze on day 1 to 6 revealed no differences between the groups. Mean values for the GH group (pink), the antagonizing GH (aGH) group (blue), and the control group (green). Black lines indicate SEM.* ***C)*** *Path length in the water maze during acquisition showed no significant differences between the groups.*

***Supplementary Figure 3:*** *Quantification of activated growth hormone receptors by p-Stat5 in pilot experiments in rats receiving five-fold higher virus titers. As for the standard dose used in all other presented data, rats treated with AAV expressing growth hormone (GH) had more p-Stat5 positive DAPI cells (ANOVA F(2,36) = 3.68, p = 0.035, t-test p = 0.02), but the antagonizing GH (aGH) group did not show a significant decrease. Count numbers are not directly comparable to Figure 2E as a smaller counting window was used.*
